# Supplementary material for: Ambient air pollution, weather changes, and outpatient visits for allergic conjunctivitis: A retrospective registry study
Source: PubMed Central journal article supplement (PMC4817244; doi:10.1038/srep23858), 2016-04-01
Supplement: srep23858-s1.pdf [file srep23858-s1.pdf]

## Supplementary Information

### Ambient air pollution, weather changes, and outpatient visits for allergic conjunctivitis: A retrospective registry study

Jiaxu Hong, Taoling Zhong, Huili Li, Jianming Xu, Xiaofang Ye, Zhe Mu, Yi Lu, Alireza Mashaghi, Ying Zhou, Mengxi Tan, Qiyuan Li, Xinghuai Sun, Zuguo Liu, Jianjiang Xu

#### Supplementary File 1: Distribution of weekly outpatient visits for allergic conjunctivitis

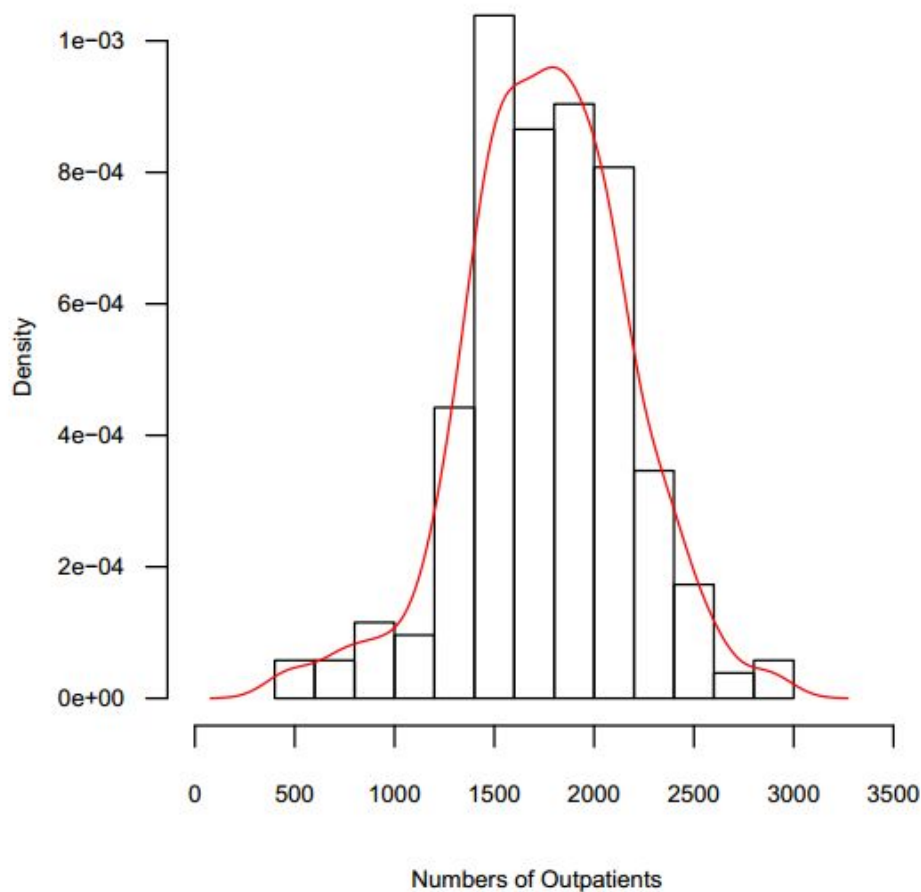

**Figure Legend:** The Anderson–Darling normality test indicated that the distribution is close to normal distribution ( $P = 0.0939$ ).

**Supplementary File 2 Correlation between the Number of Outpatients, with the  
Interaction between each Pollutant and the Weather Condition by the Stepwise**

**Regression Method**

| <b>Variables</b>                     | <b>Estimate (95% CI)</b>  | <b><i>P</i> value</b> |
|--------------------------------------|---------------------------|-----------------------|
| <b>SO<sub>2</sub></b>                | 12.942 (-80.66, 106.543)  | 0.7856                |
| <b>SO<sub>2</sub>: Wind Velocity</b> | -0.461 (-35.698, 34.776)  | 0.9795                |
| <b>NO<sub>2</sub></b>                | 267.814 (75.457, 460.172) | 0.0065                |
| <b>NO<sub>2</sub>: Humidity</b>      | -2.999 (-5.765, -0.234)   | 0.0336                |
| <b>PM<sub>10</sub></b>               | -2.555 (-14.654, 9.545)   | 0.6779                |
| <b>O<sub>3</sub></b>                 | 24.411 (-24.092, 72.914)  | 0.3226                |
| <b>O<sub>3</sub>: Temperature</b>    | -0.431 (-2.339, 1.477)    | 0.6569                |

**Supplementary File 3 The *P*-value of Ljung-Box Test for the ARMA Model to Fit the Residual of the Univariate Linear Model when Latency is from 1 to 5 Weeks**

| <b>Variables</b>         | <b>lag=1</b> | <b>lag=2</b> | <b>lag=3</b> | <b>lag=4</b> | <b>lag=5</b> |
|--------------------------|--------------|--------------|--------------|--------------|--------------|
| <b>SO<sub>2</sub></b>    | 0.4501       | 0.5845       | 0.9562       | 0.9901       | 0.9708       |
| <b>NO<sub>2</sub></b>    | 0.0074       | 0.0245       | 0.6414       | 0.9442       | 0.8835       |
| <b>PM<sub>10</sub></b>   | 0.0008       | 0.0094       | 0.5096       | 0.8696       | 0.8338       |
| <b>O<sub>3</sub></b>     | 0.0051       | 0.0082       | 0.4706       | 0.7899       | 0.4054       |
| <b>Temperature</b>       | 0.0026       | 0.0046       | 0.3423       | 0.7650       | 0.4852       |
| <b>Humidity</b>          | 0.0001       | 0.0019       | 0.4564       | 0.9421       | 0.8453       |
| <b>Wind<br/>Velocity</b> | 0.0001       | 0.0018       | 0.4593       | 0.9402       | 0.8446       |

**Supplementary File 4 Principal component analysis for the cutoff age**

| Variable          | <20      |                | 20-50    |                | ≥50      |                |
|-------------------|----------|----------------|----------|----------------|----------|----------------|
|                   | Estimate | <i>P</i> value | Estimate | <i>P</i> value | Estimate | <i>P</i> value |
| SO <sub>2</sub>   | 0.2369   | 0.2912         | 0.2347   | 0.4198         | -2.8406  | 0.0451         |
| NO <sub>2</sub>   | 0.3130   | 0.1236         | 0.5869   | 0.0273         | 2.6528   | 0.0506         |
| PM <sub>10</sub>  | 0.1223   | 0.0537         | 0.0500   | 0.5480         | -0.0163  | 0.9700         |
| O <sub>3</sub>    | 0.7192   | 0.0000         | 0.4973   | 0.0005         | -0.0817  | 0.9106         |
| PM <sub>2.5</sub> | 0.0019   | 0.9884         | 0.0859   | 0.5977         | -0.2974  | 0.7104         |
| temp.av           | 3.5536   | 0.0000         | 3.7688   | 0.0001         | 10.6424  | 0.0072         |
| temp.hi           | 3.1007   | 0.0000         | 3.2072   | 0.0001         | 9.0609   | 0.0115         |
| temp.lo           | 2.7642   | 0.0008         | 3.4234   | 0.0006         | 11.0969  | 0.0055         |
| pres.av           | -1.1897  | 0.0576         | -0.6774  | 0.3932         | -4.0442  | 0.2545         |
| prec              | 0.0002   | 0.7300         | -0.0001  | 0.8655         | -0.0030  | 0.4653         |
| humi.av           | -1.0184  | 0.0005         | -0.9148  | 0.0170         | -1.1010  | 0.5858         |
| velo.av           | -1.3714  | 0.7217         | 6.8841   | 0.1786         | 73.3291  | 0.0060         |
